# Supplementary material
Source: Springer Nature journal article supplement (https://www.springermedizin.de/resource/supplementary/13014_2010_338_MOESM2_ESM.pdf/9633398)

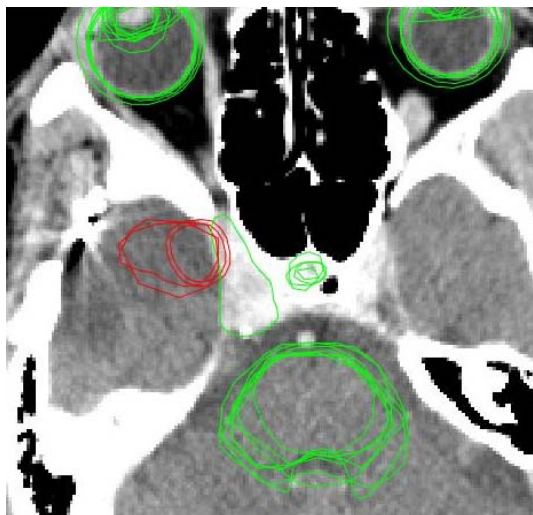

(a)

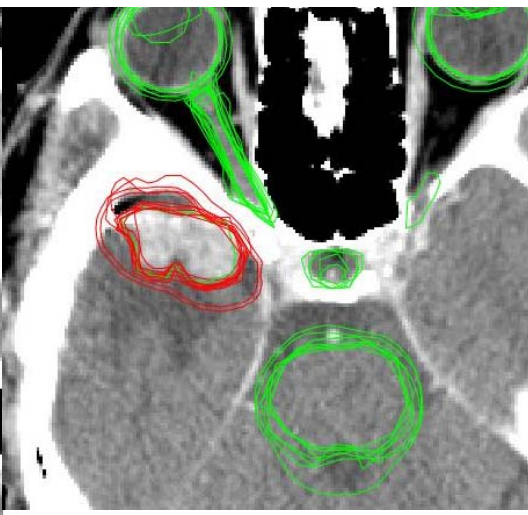

(b)

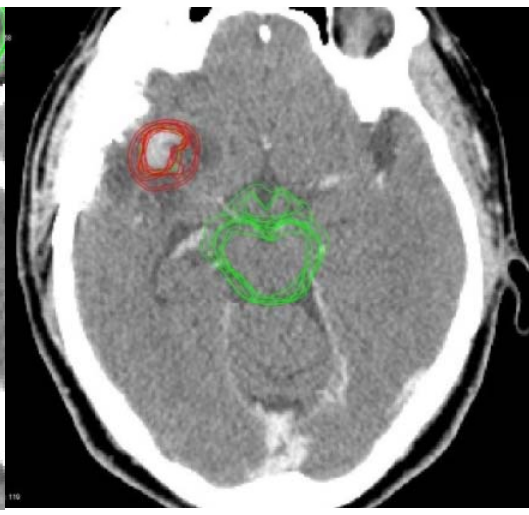

(c)

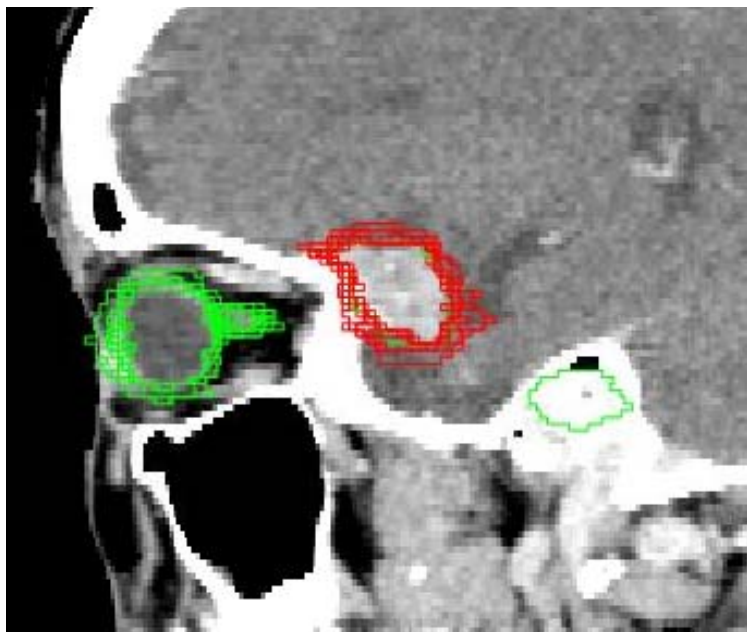

(d)

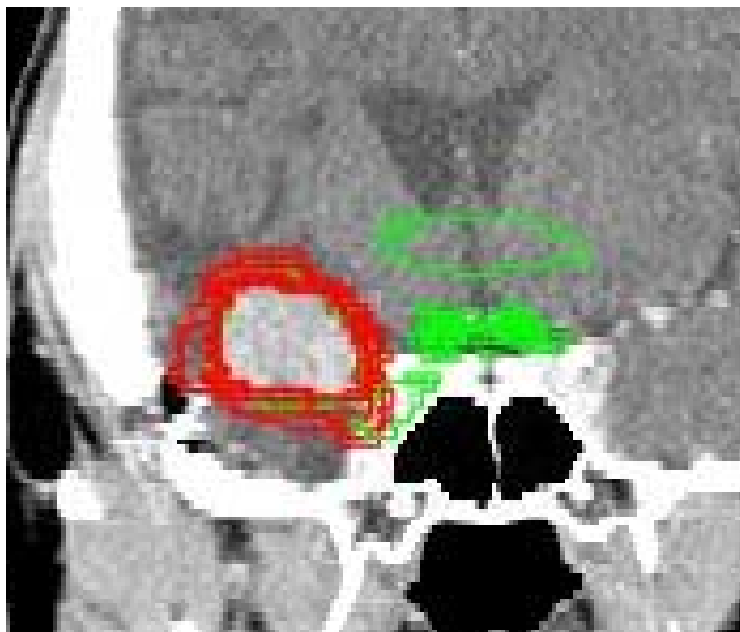

(e)

Supplement: MOESM2 [file 9633398]
